# Supplementary material for: A general approach to construct selenopheno[3,2-b]indole-cored molecules using Fischer indolization
Source: Royal Society of Chemistry journal article supplement (doi:10.1039/d4ob00788c), 2024-01-01

## Supplementary Information

### **A general approach to construct selenopheno[3,2-*b*]indole-cored molecules using Fischer indolization**

**Roman A. Irgashev\* and Alexander S. Steparuk**

Postovsky Institute of Organic Synthesis, Ural Branch of the Russian Academy of Sciences,  
Ekaterinburg, 620137, Russia

\*Corresponding author, e-mail: [irgashev\\_ra@mail.ru](mailto:irgashev_ra@mail.ru), [irgashev@ios.uran.ru](mailto:irgashev@ios.uran.ru)

### **Table of content**

|                                                                                                   |           |
|---------------------------------------------------------------------------------------------------|-----------|
| 1. Photos of starting compounds <b>12a-d</b> , <b>13</b> , <b>14</b> , <b>15a,b</b> and <b>16</b> | <b>S2</b> |
| 2. Photos of selenopheno[3,2- <i>b</i> ]indoles <b>18</b>                                         | <b>S2</b> |
| 3. Photos of pyrido[3',2':4,5]selenopheno[3,2- <i>b</i> ]indoles <b>19</b>                        | <b>S4</b> |
| 4. Photos of pyrazino[2',3':4,5]selenopheno[3,2- <i>b</i> ]indole <b>20</b>                       | <b>S5</b> |
| 5. Photos of chromeno[3',4':4,5]selenopheno[3,2- <i>b</i> ]indol-6-ones <b>21</b>                 | <b>S6</b> |
| 6. Photos of benzo[4,5]selenopheno[3,2- <i>b</i> ]indoles <b>22</b>                               | <b>S6</b> |

1. Photos of starting compounds **12a-d**, **13**, **14**, **15a,b** and **16**

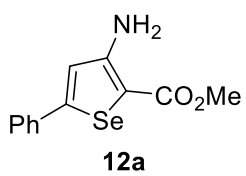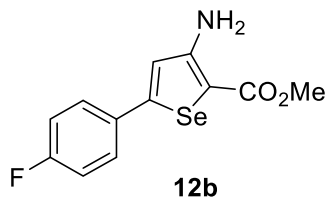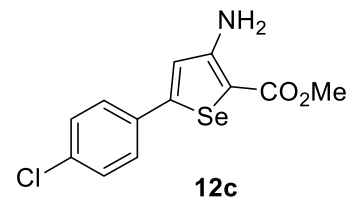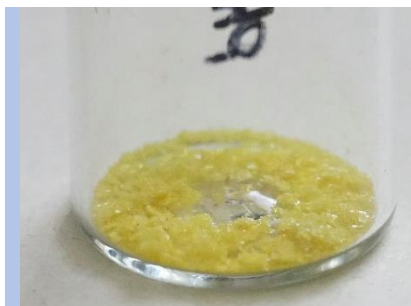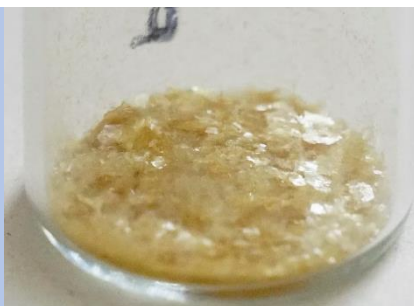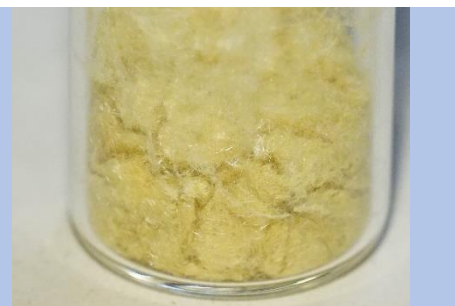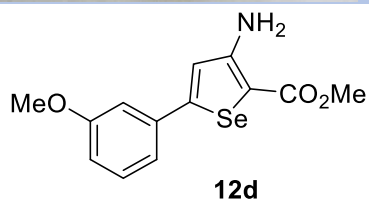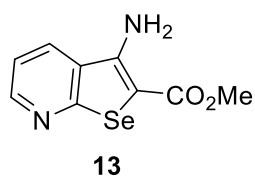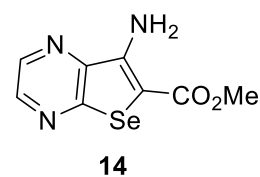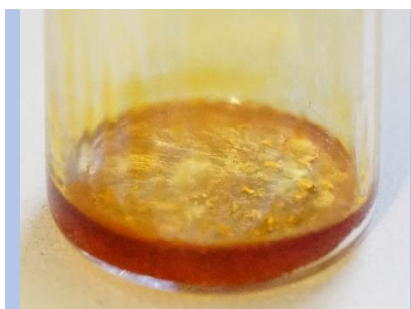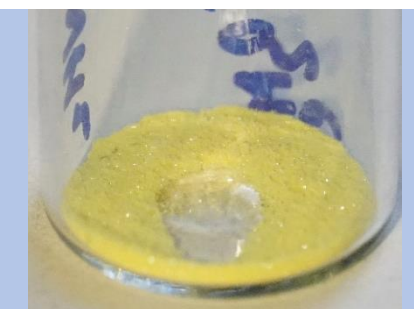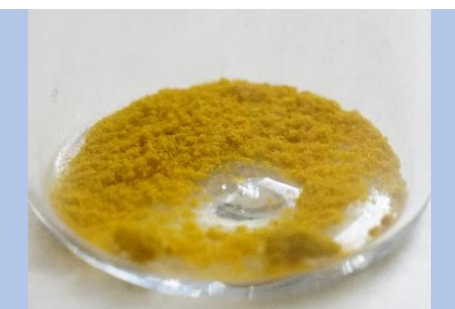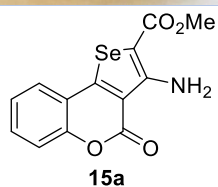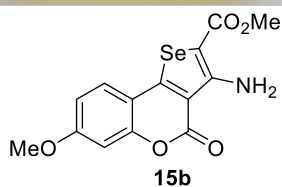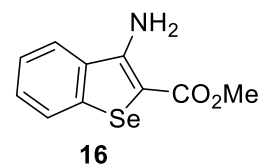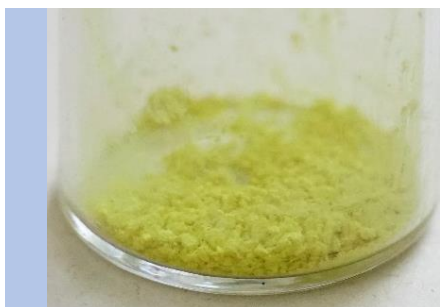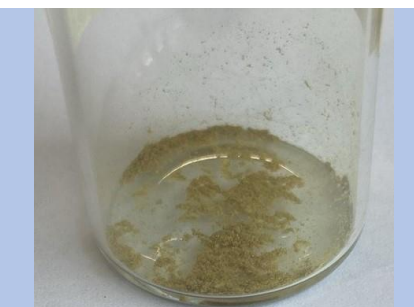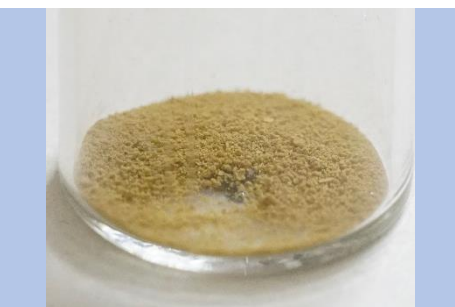

2. Photos of selenopheno[3,2-*b*]indoles **18**

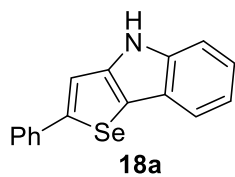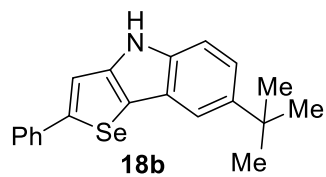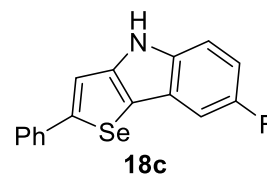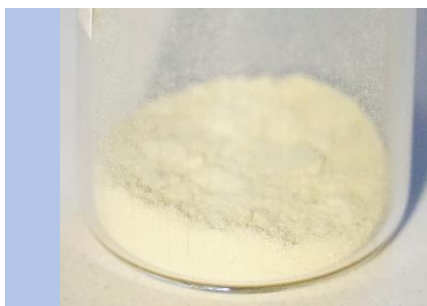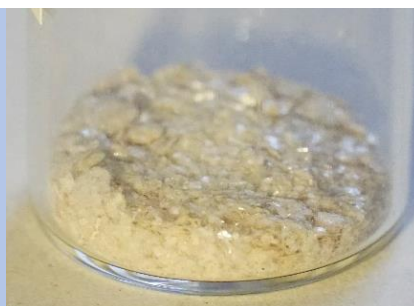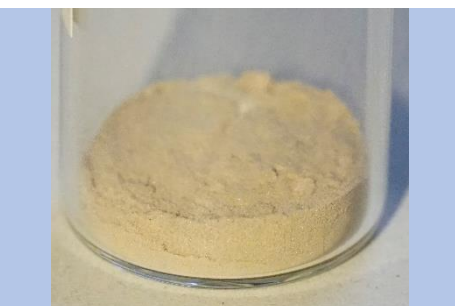

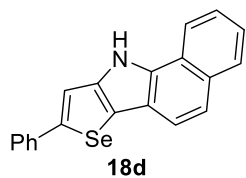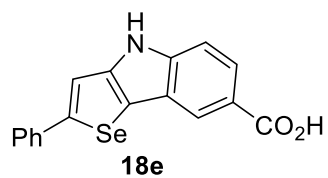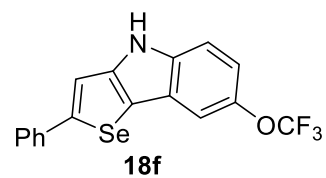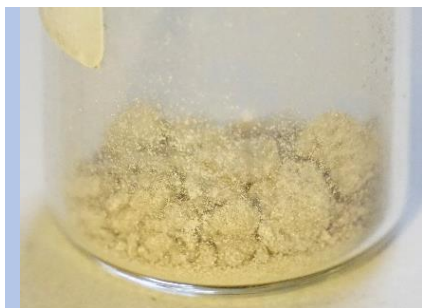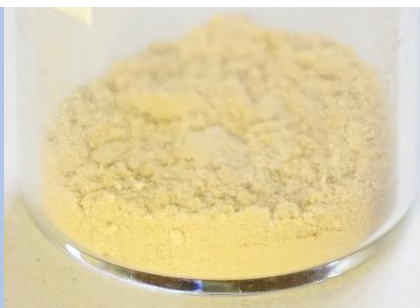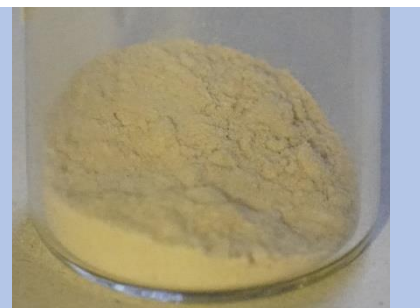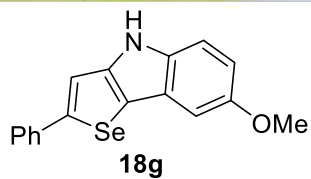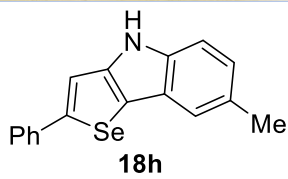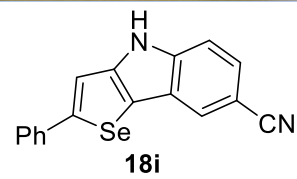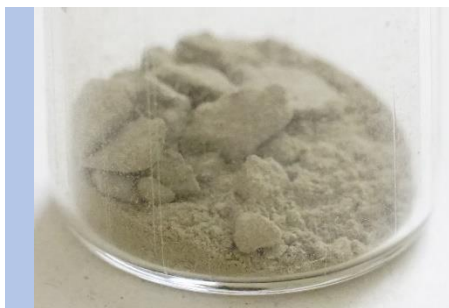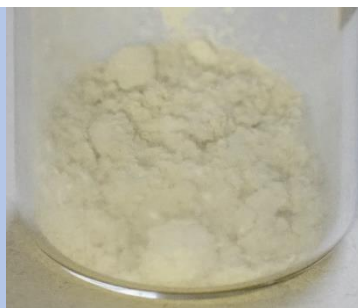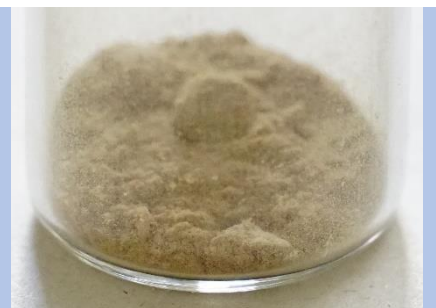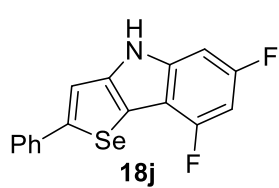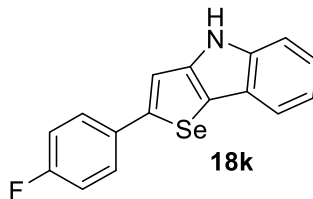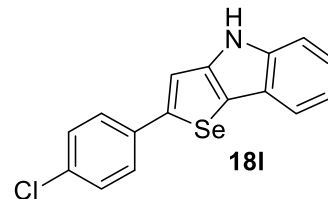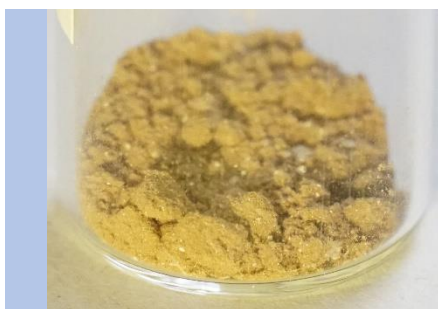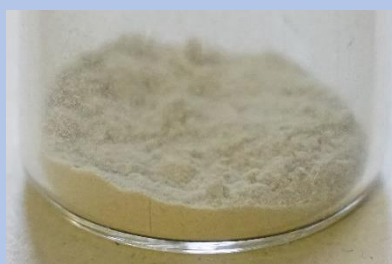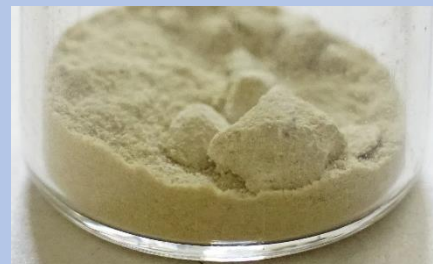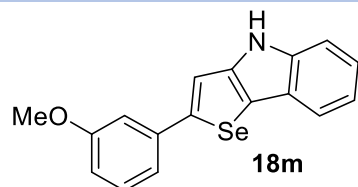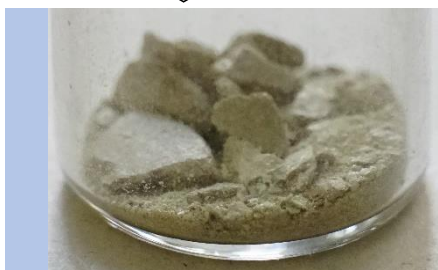



### 3. Photos of pyrido[3',2':4,5]selenopheno[3,2-*b*]indoles **19**

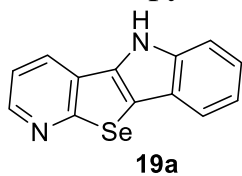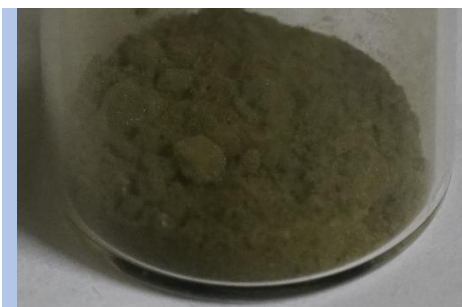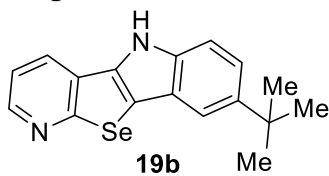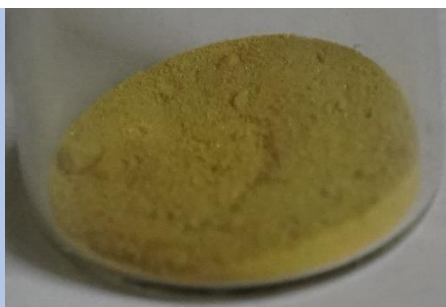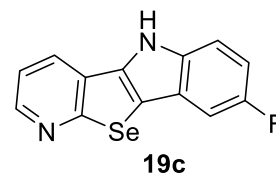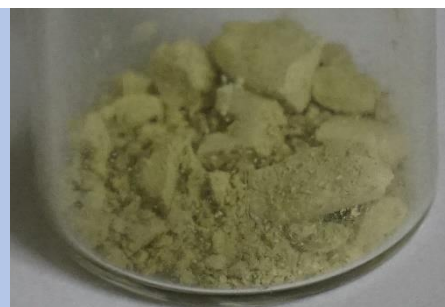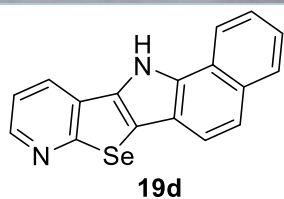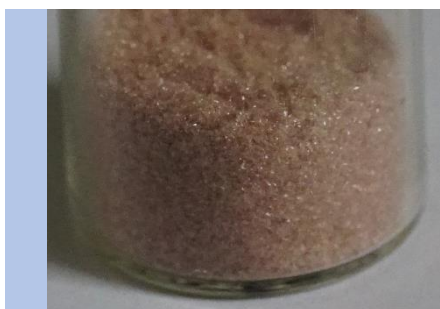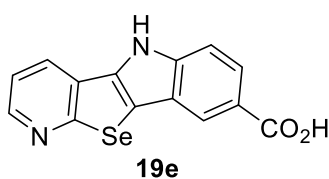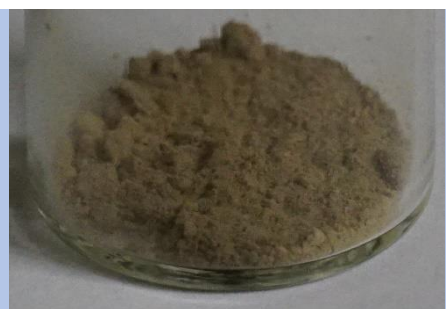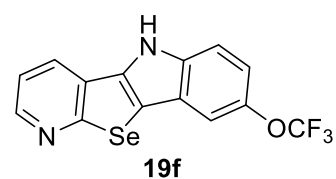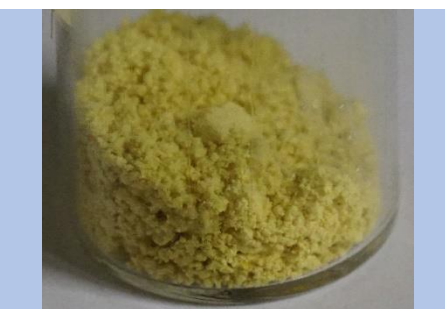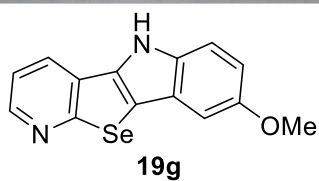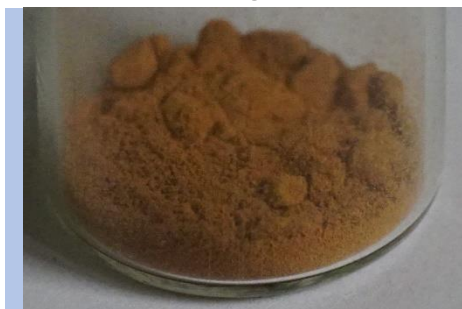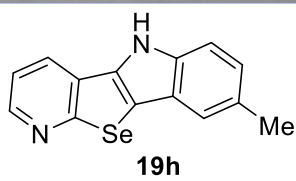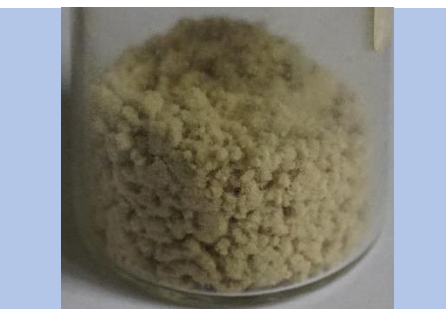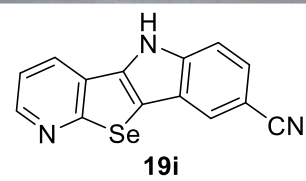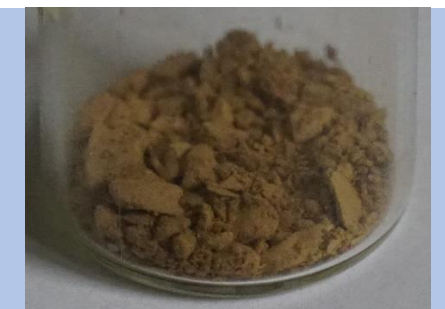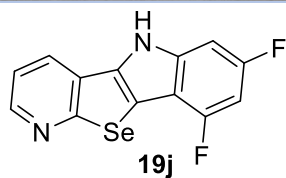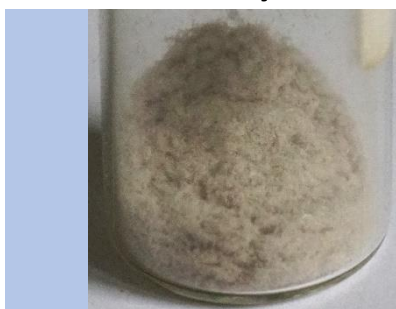

4. Photos of pyrazino[2',3':4,5]selenopheno[3,2-*b*]indole **20**

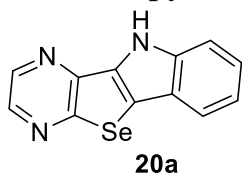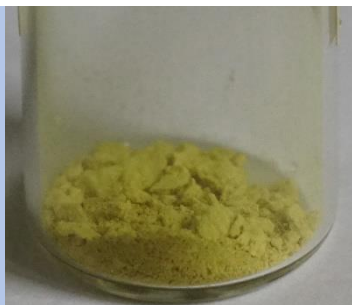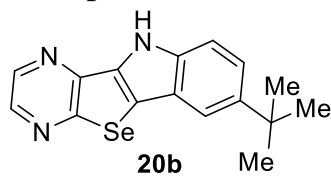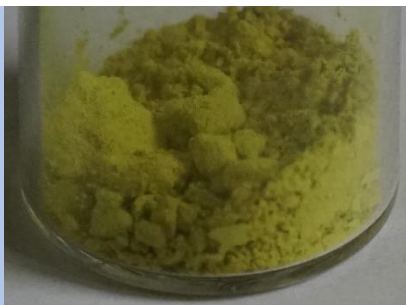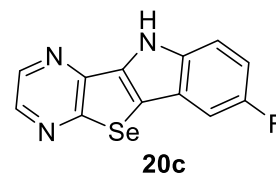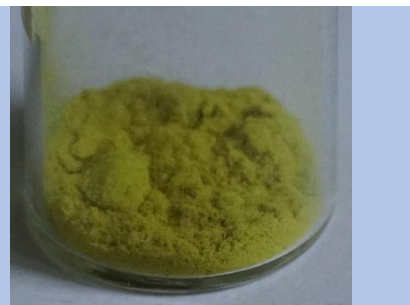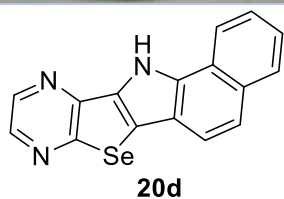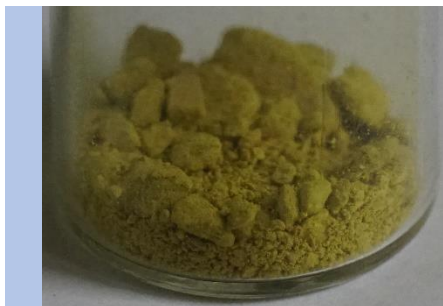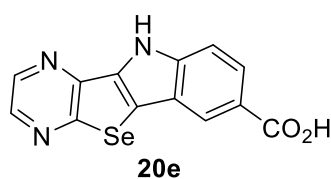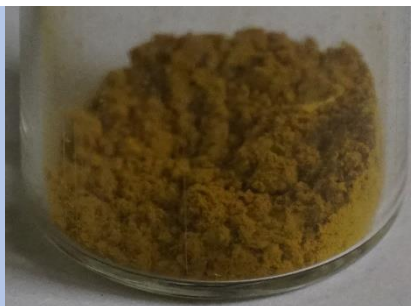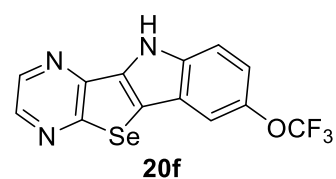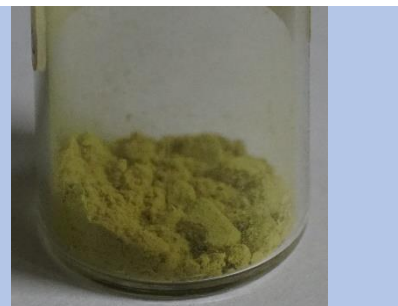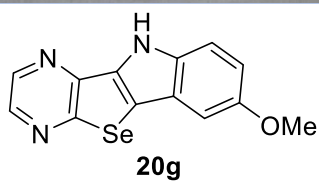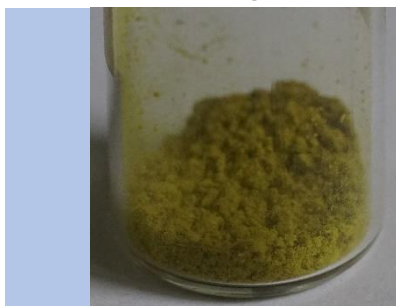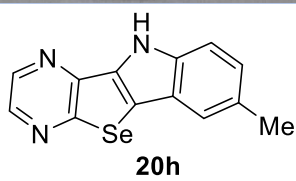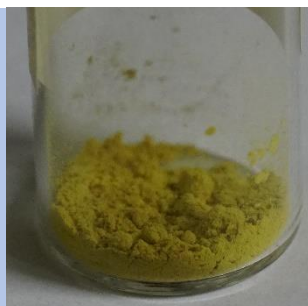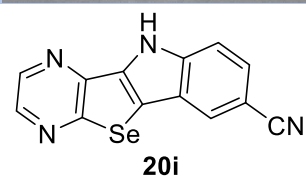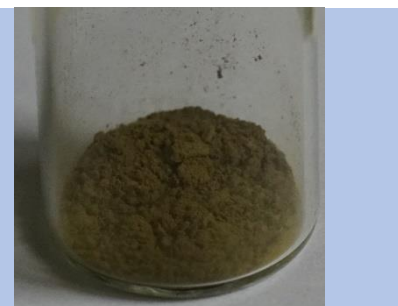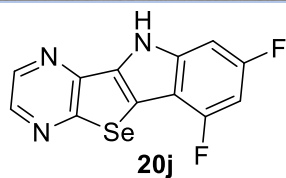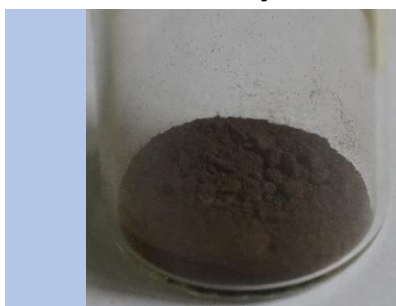

5. Photos of chromeno[3',4':4,5]selenopheno[3,2-*b*]indol-6-ones **21**

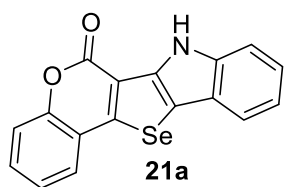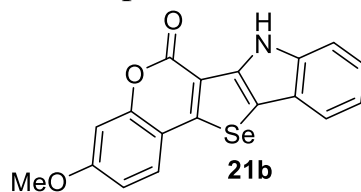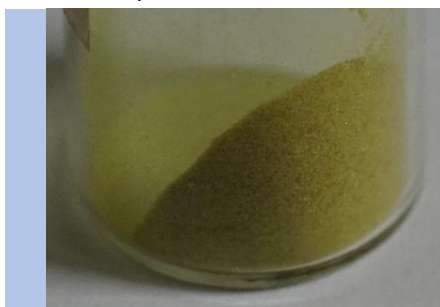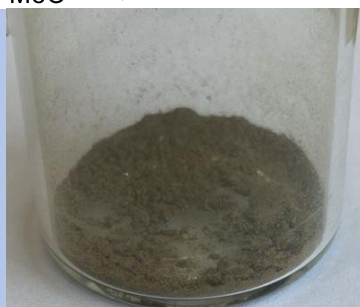

6. Photos of benzo[4,5]selenopheno[3,2-*b*]indoles **22**

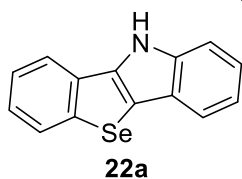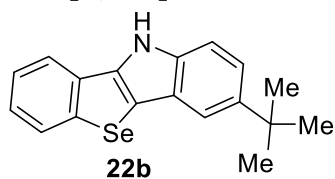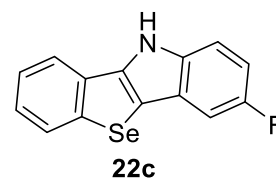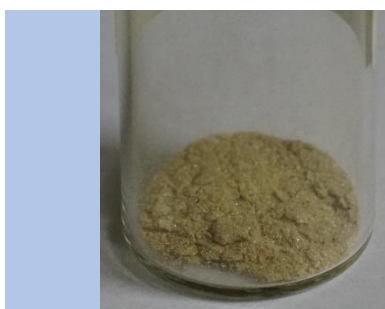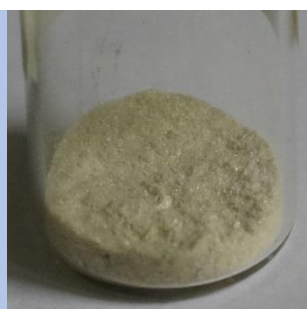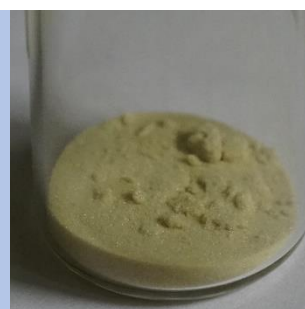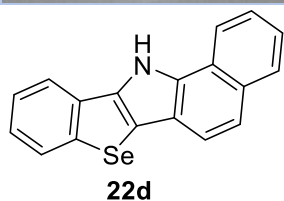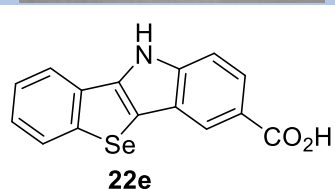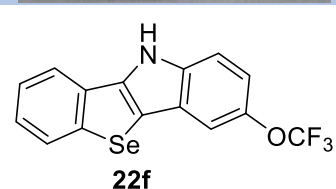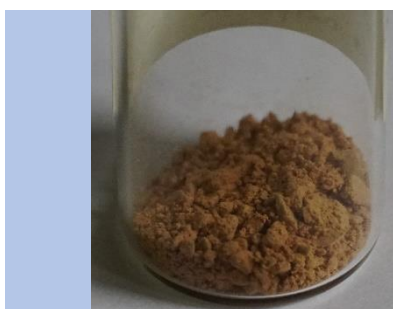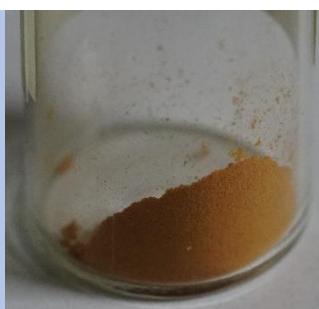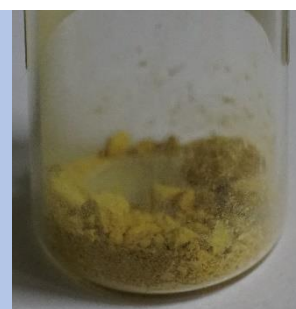

Supplement: d4ob00788c2.pdf [file d4ob00788c2.pdf]
